# Supplementary material
Source: publisher site journal article supplement (https://www.dovepress.com/article/236915)
Supplement: Supplementary file 1 [file get_supplementary_file.php]

**Supplementary Table** Primers and oligonucleotides

| **Gene** | **Sequences (5'→3')** |
| --- | --- |
| **Primers for real-time PCR**a | |
| ACC_F | ATGTCTGGCTTGCACCTAGTA |
| ACC_R | CCCCAAAGCGAGTAACAAATTCT |
| FASN_F | AAGGACCTGTCTAGGTTTGATGC |
| FASN_R | TGGCTTCATAGGTGACTTCCA |
| SCD1_F | TCTAGCTCCTATACCACCACCA |
| SCD1_R | TCGTCTCCAACTTATCTCCTCC |
| SREBP-1_F | CGGAACCATCTTGGCAACAGT |
| SREBP-1_R | CGCTTCTCAATGGCGTTGT |
| LXR_F | CCTTCAGAACCCACAGAGATCC |
| LXR_R | ACGCTGCATAGCTCGTTCC |
| PPARγ_F | ACCAAAGTGCAATCAAAGTGGA |
| PPARγ_R | ATGAGGGAGTTGGAAGGCTCT |
| CD36_F | CTTTGGCTTAATGAGACTGGGAC |
| CD36_R | GCAACAAACATCACCACACCA |
| FABP1_F | AAGACAGTGGTTCAGTTGGAAG |
| FABP1_R | TGAGTTCGGTCACAGACTTGAT |
| FATP5_F | GCTTCGGTCCTATTCGGATCT |
| FATP5_R | CAGCGCCCCACATAGTTGA |
| SHP_F | GTGCCCAGCATACTCAAGAAG |
| SHP_R | TGGGGTCTGTCTGGCAGTT |
| FXR_F | GACTTTGGACCATGAAGACCAG |
| FXR_R | GCCCAGACGGAAGTTTCTTATT |
| CYP7A1_F | AGAAGCATTGACCCGATGGAT |
| CYP7A1_R | AGCGGTCTTTGAGTTAGAGGA |
| FOXO3_F | TCACGCACCAATTCTAACGC |
| FOXO3_R | CACGGCTTGCTTACTGAAGG |
| CIDEB_F | CAGCGACCTTTCCGTGTCT |
| CIDEB_R | GGGTCTCCAATGCTTTGGCT |
| β-actin_F | CATGTACGTTGCTATCCAGGC |
| β-actin_R | CTCCTTAATGTCACGCACGAT |
| **Primers for plasmid construction** | |
| HNF1α_F | ACGGGCCCTCTAGACTCGAGCGCCACCATGGTTTCTAAACTGAGCCAGC |
| HNF1α_R | AGTCACTTAAGCTTGGTACCGACTGGGAGGAAGAGGCCATCTGG |
| **siRNA**b | |
| siHNF1α-1_sense | GGUCUUCACCUCAGACACUtt |
| siHNF1α-1_antisense | AGUGUCUGAGGUGAAGACCtt |
| siHNF1α-2_sense | GGCAGAAGAACCCUAGCAAtt |
| siHNF1α-2_antisense | UUGCUAGGGUUCUUCUGCCtt |

**Notes:** aSequences of primers for real-time PCR were obtained from the PrimerBank database; bSequences of siRNA were obtained from a previous study conducted by Pelletier L.1

**Abbreviations:** PCR, polymerase chain reaction; F, forward; R, reverse; ACC, acetyl-CoA carboxylase; FASN, fatty acid synthase; SCD1, stearoyl-coenzyme A desaturase 1; SREBP-1, sterol regulatory element-binding protein-1; LXR, liver X receptor; PPARγ, peroxisome proliferator-activated receptor γ; FABP1, fatty acid-binding protein 1; FATP5, fatty acid transport protein 5; SHP, small heterodimer partner; FXR, farnesoid X receptor; CYP7A1, cholesterol 7-alpha hydroxylase; FOXO3, forkhead box O3; CIDEB, cell death-inducing DFFA-like effector B; HNF1α, hepatocyte nuclear factor 1α; siRNA, small interference RNA; siHNF1α, specific siRNA targeting HNF1α.

Reference:

1.Pelletier L, Rebouissou S, Paris A, et al. Loss of hepatocyte nuclear factor 1alpha function in human hepatocellular adenomas leads to aberrant activation of signaling pathways involved in tumorigenesis. Hepatology. 2010;51(2):557–566. doi:10.1002/hep.23362
